# Supplementary material for: Ion migration in Br-doped MAPbI3 and its inhibition mechanisms investigated via quantum dynamics simulations
Source: Royal Society of Chemistry journal article supplement (doi:10.1039/d0cp00866d), 2020-01-01
Supplement: d0cp00866d1.pdf [file d0cp00866d1.pdf]

## **Supporting Information**

### **Ion Migration in Br-Doped MAPbI<sub>3</sub> and Its Inhibition Mechanisms**

#### **Investigated Via Quantum Dynamics Simulations**

Bing Zhang,<sup>\*a,b</sup> Yinjie Liao<sup>b</sup>, Lei Tong<sup>b</sup>, Jieqing Yang<sup>b</sup>, Xiaogang Wang<sup>b</sup>

<sup>a</sup>Beijing Key Laboratory of Energy Security and Clean Utilization, North China Electric Power University, Beijing 102206, China.

<sup>b</sup>School of Renewable Energy, North China Electric Power University, Beijing, 102206, China.

\*Corresponding authors, E-mail: 51101869@ncepu.edu.cn; Tel: +86-(10)-6177-2079

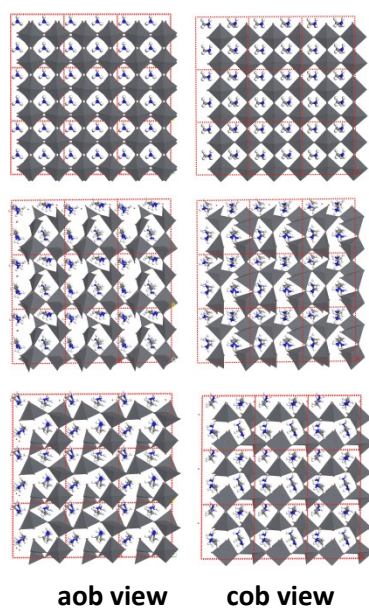

**Fig. S1** Structures of the initial and equilibrium stage of MAPbI<sub>3</sub>-450K from aob and cob view, respectively.

**Table S1** The number of connections between two adjacent [PbX<sub>6</sub>]<sup>4-</sup> octahedrons in MAPb(I<sub>0.4</sub>Br<sub>0.6</sub>)<sub>3</sub>

| Time(ps)         |       | Connection number | Total number | Ratio  | Average ratio |
|------------------|-------|-------------------|--------------|--------|---------------|
| Before migration | 23ps  | 4                 | 24           | 16.66% | 24.16%        |
|                  | 39ps  | 8                 | 24           | 33.33% |               |
|                  | 55ps  | 6                 | 24           | 25.00% |               |
|                  | 71ps  | 4                 | 24           | 16.66% |               |
|                  | 87ps  | 7                 | 24           | 29.16% |               |
| After migration  | 92ps  | 11                | 24           | 45.83% | 33.33%        |
|                  | 119ps | 6                 | 24           | 25.00% |               |
|                  | 146ps | 5                 | 24           | 20.83% |               |
|                  | 173ps | 10                | 24           | 41.66% |               |
|                  | 200ps | 8                 | 24           | 33.33% |               |

**Table S2** The band gap values of MAPb(I<sub>0.4</sub>Br<sub>0.6</sub>)<sub>3</sub>

|                  | Time(ps) | Valence(eV) | Conduction(eV) | Band gap(eV) | Average (eV) |
|------------------|----------|-------------|----------------|--------------|--------------|
| Before migration | 23ps     | -0.453      | 1.039          | 1.492        | 1.557        |
|                  | 39ps     | -0.441      | 0.977          | 1.418        |              |
|                  | 55ps     | -0.434      | 1.326          | 1.760        |              |
|                  | 71ps     | -0.446      | 1.159          | 1.605        |              |
|                  | 87ps     | -0.436      | 1.074          | 1.510        |              |
| After migration  | 92ps     | -0.438      | 0.979          | 1.417        | 1.450        |
|                  | 119ps    | -0.453      | 1.114          | 1.567        |              |
|                  | 146ps    | -0.437      | 1.155          | 1.592        |              |
|                  | 173ps    | -0.465      | 0.851          | 1.316        |              |
|                  | 200ps    | -0.457      | 0.902          | 1.359        |              |

**Table S3** The number of connections between two adjacent [PbX<sub>6</sub>]<sup>4-</sup> octahedrons in Cs<sub>0.125</sub>MA<sub>0.875</sub>Pb(I<sub>0.4</sub>Br<sub>0.6</sub>)<sub>3</sub>

| Time(ps) | Connection number | Total number | Ratio  | Average ratio |
|----------|-------------------|--------------|--------|---------------|
| 20ps     | 7                 | 24           | 29.16% | 32.08%        |
| 40ps     | 8                 | 24           | 33.33% |               |
| 60ps     | 6                 | 24           | 25.00% |               |
| 80ps     | 12                | 24           | 50.00% |               |
| 100ps    | 8                 | 24           | 33.33% |               |
| 120ps    | 5                 | 24           | 20.83% |               |
| 140ps    | 7                 | 24           | 29.16% |               |
| 160ps    | 7                 | 24           | 29.16% |               |
| 180ps    | 9                 | 24           | 37.50% |               |
| 200ps    | 8                 | 24           | 33.33% |               |

**Table S4** The band gap values of Cs<sub>0.125</sub>MA<sub>0.875</sub>Pb(I<sub>0.4</sub>Br<sub>0.6</sub>)<sub>3</sub>

| Time(ps) | Valence(eV) | Conduction(eV) | Band gap(eV) | Average (eV) |
|----------|-------------|----------------|--------------|--------------|
| 20ps     | -0.462      | 0.967          | 1.429        | 1.562        |
| 40ps     | -0.448      | 1.219          | 1.667        |              |
| 60ps     | -0.449      | 1.210          | 1.659        |              |
| 80ps     | -0.437      | 1.031          | 1.468        |              |
| 100ps    | -0.427      | 1.044          | 1.471        |              |
| 120ps    | -0.449      | 1.006          | 1.455        |              |
| 140ps    | -0.446      | 1.096          | 1.542        |              |
| 160ps    | -0.447      | 1.090          | 1.537        |              |
| 180ps    | -0.447      | 1.233          | 1.680        |              |
| 200ps    | -0.449      | 1.266          | 1.715        |              |
